# Supplementary material
Source: publisher figshare collection journal article supplement (https://gsajournals.figshare.com/ndownloader/files/25816565)
Supplement: Supplementary file 1 [file 25816565]

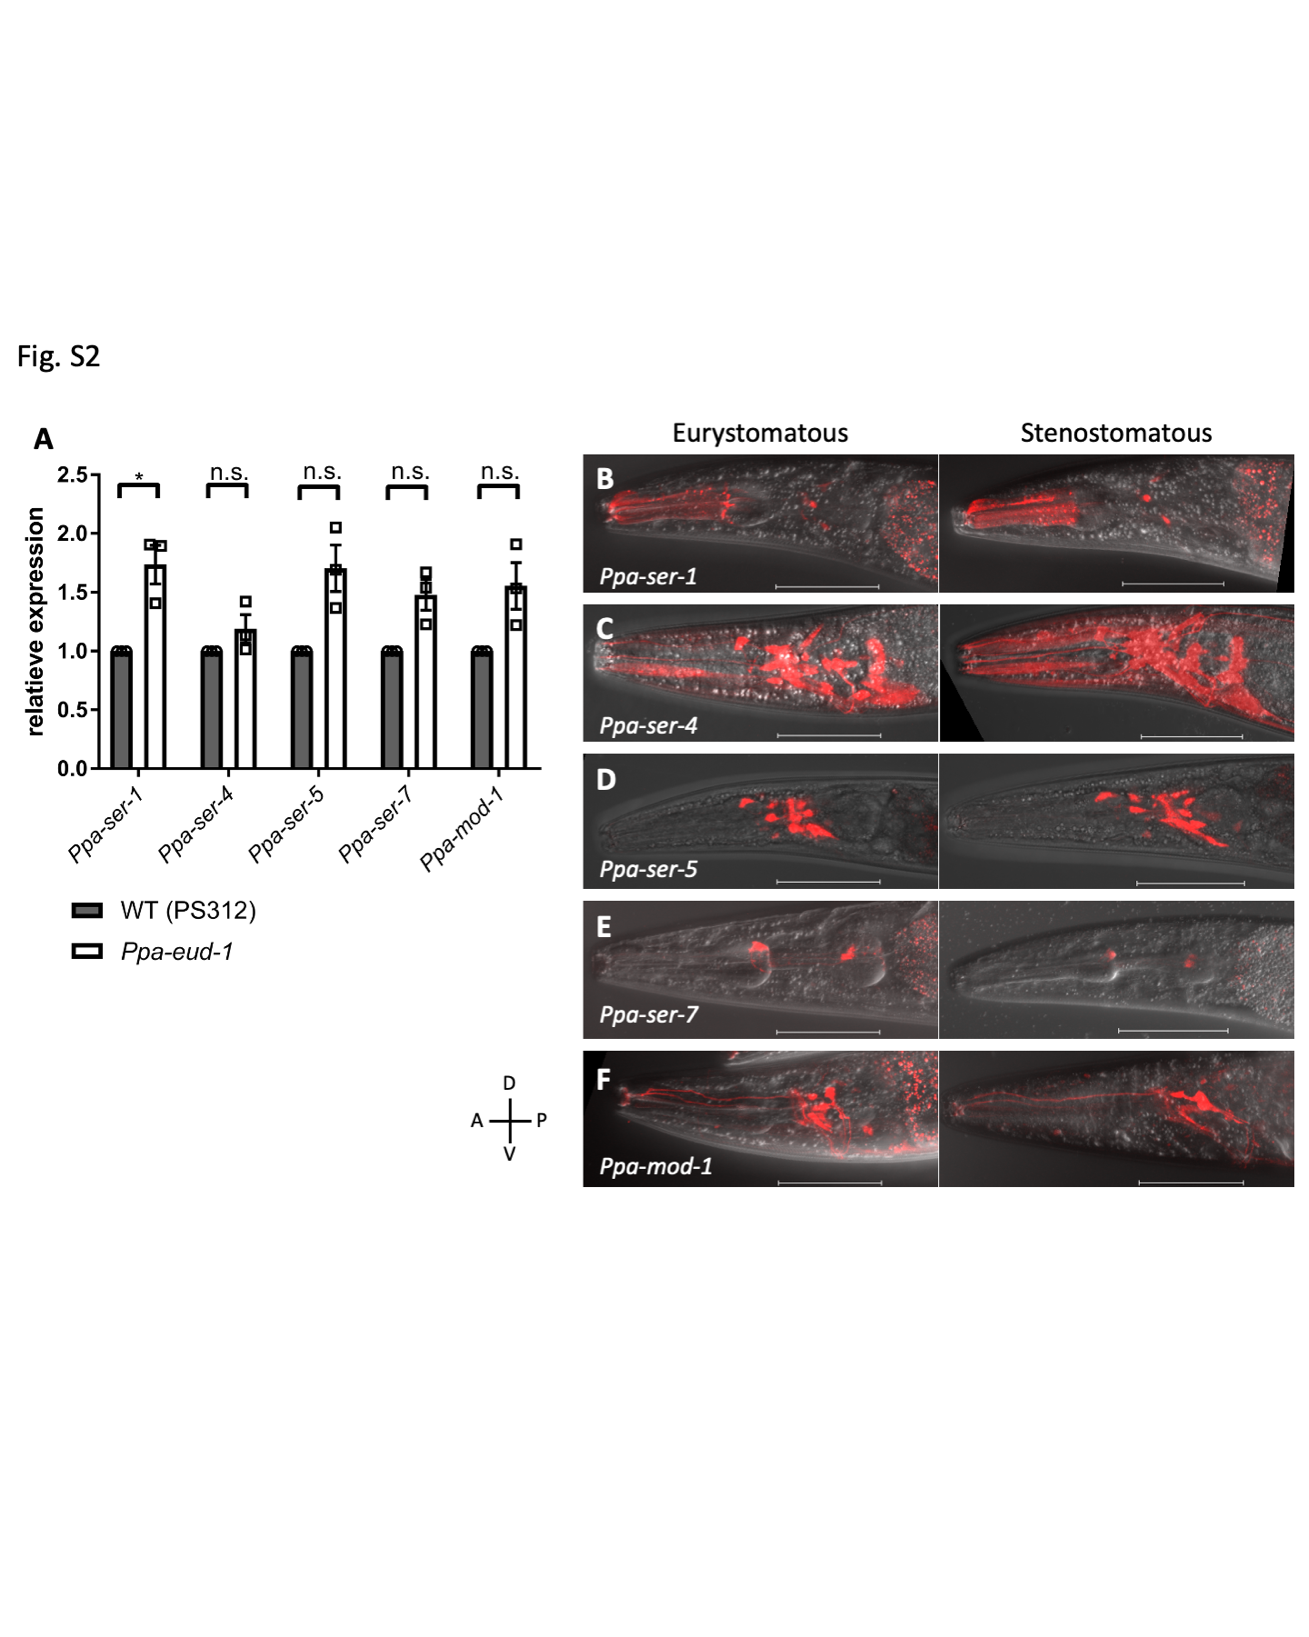


**Figure S2.** The expression patterns of serotonin receptors were not different between eurystomatous and stenostomatous worms.

(A) A comparison of the relative serotonin receptor expression levels between the eurystomatous-dominant wild-type strain (PS312) and the all-stenostomatous *Ppa-eud-1* mutant by qRT-PCR. n = 3 biological replicates for each gene. Error bars represent the SEM. Student's t-test for each gene. n.s., not significant. * p < 0.05.

(B–F) A comparison of the expression patterns of serotonin receptors between eurystomatous and stenostomatous animals with PS312 background. The figures show merged images of turboRFP fluorescence (shown in red) and DIC images in serotonin receptor reporter animals. A, anterior. P, posterior. D, dorsal. V, ventral. Scale bars, 50 µm.
